# Supplementary material
Source: Springer Nature journal article supplement (https://www.springermedizin.de/resource/supplementary/13075_2011_3649_MOESM1_ESM.pdf/9695040)

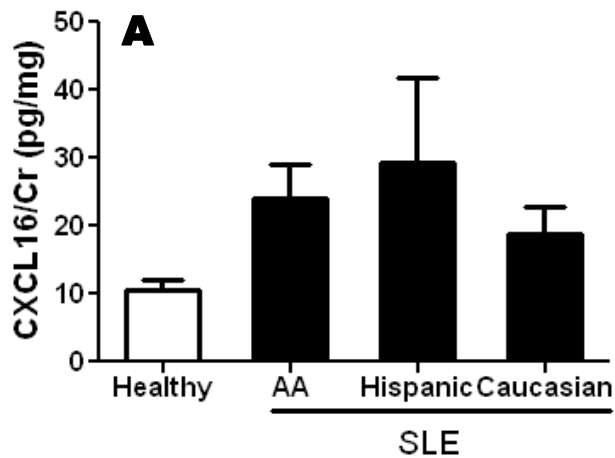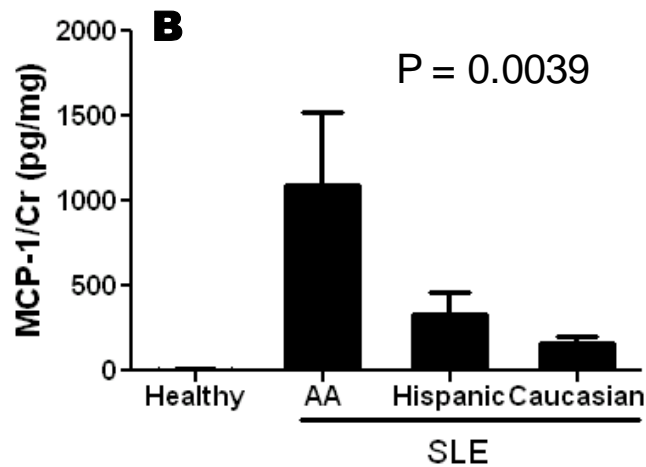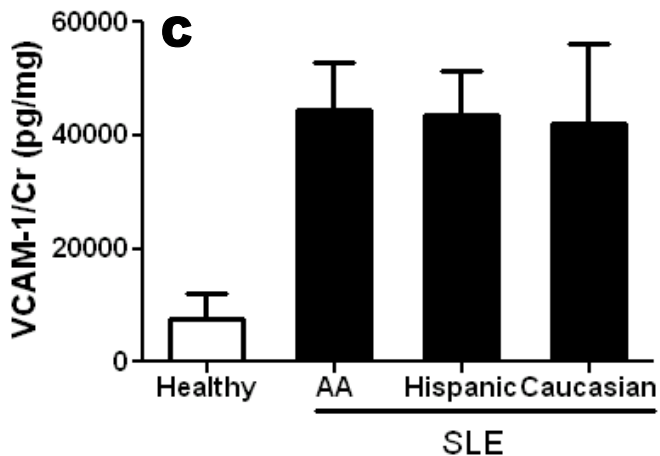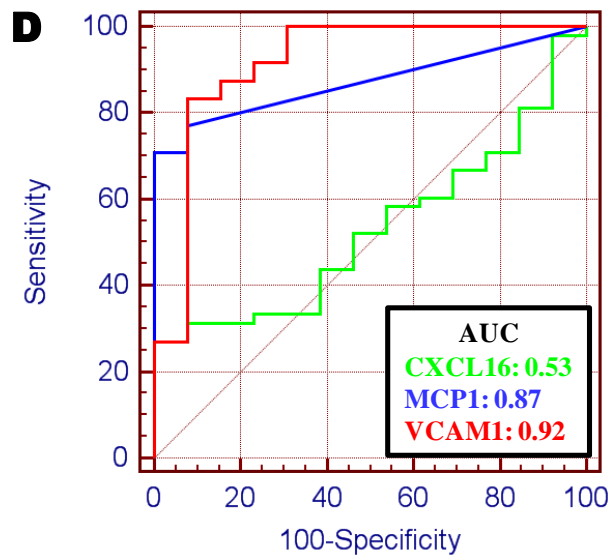

Supplement: MOESM1 [file 9695040]
